# Supplementary material for: Integrated molecular and multiparametric MRI mapping of high-grade glioma identifies regional biologic signatures
Source: PubMed Central journal article supplement (PMC10539500; doi:10.1038/s41467-023-41559-1), 2023-09-28
Supplement: 41467_2023_41559_MOESM4_ESM.pdf [file 41467_2023_41559_MOESM4_ESM.pdf]

## **Description of Additional Supplementary Files Document**

**Supplementary Data 1** – GENOMICS -- Multiregional cohort information, Case Assay, Somatic Mutations, Gene Level Copy Number

**Supplementary Data 2** - Statistical values for additional MEM models.

**Supplementary Data 3** – TRANSCRIPTOMICS -- Combat counts, pathway-based classifications, transcriptomic classifications

**Supplementary Data 4** – GENE ONTOLOGY – differentially expressed genes, tumor microenvironment signatures

**Supplementary Data 5** – Correlation between pathway-based classifications and conventional MRI features

**Supplementary Data 6** – Correlation between pathway-based classifications and advanced imaging features

**Supplementary Data 7** - Sample Sizes for Correlative Analyses
